# Supplementary material
Source: Springer Nature journal article supplement (https://www.springermedizin.de/resource/supplementary/13002_2014_444_MOESM4_ESM.docx/9626938)
Supplement: MOESM4 [file 9626938]

**Table 1: List of pteridophytes used as fodder and human food in sub-Saharan Africa**

| **Species, family name** | **Country, vernacular name** | **Main uses and references** |
| --- | --- | --- |
| *Blotiella glabra* (Bory) R.M.Tryon; Dennsteadtiaceae | DRC: Asaha, oheyi yasi, oheyi | Young leaves eaten raw or cooked as leafy vegetable [21] |
| *Botrychium lanuginosum* Wall. ex Hook et Grev.; Ophioglossaceae | Nigeria: Grape fern, iya, oziza ato | Young leaves eaten as green vegetable [15] |
| Ceratopteris cornuta (P. Beauv.) Lepr.; Pteridaceae | Liberia: Water lettuce | Cultivated and eaten as a leafy vegetable [14,22] |
| *Ceratopteris thalictroides* (L.) Brongn.; Pteridaceae | Madagascar | Leaves eaten as salad or cooked as vegetable [23] |
| Swaziland | Leaves eaten as leafy vegetable [24] |
| *Christella dentata* (Forssk.) Brownsey & Jermy; Thelypteridaceae | DRC: Anole | Young leaves cooked as leafy vegetable [21] |
| *Cyclosorus gongylodes* (Schkuhr) Link; Thelypteridaceae | Gambia | Leaves eaten as leafy vegetable [25] |
| *Cyathea manniana* Hook.; Cyatheaceae | DRC: Oyaele | Young leaves cooked as leafy vegetable [21] |
| *Diplazium esculentum* (Retz.) Sw.; Athyraceae | Nigeria: Akwukwo nni, vegetable fern | Young leaves eaten as vegetable with yam (*Dioscorea* spp.) [15] |
| *Diplazium proliferum* (Lam.) Thouars; Athyriaceae | Madagascar | Young still enrolled fronds (croziers, fiddleheads) are eaten as a cooked vegetable [26] |
| *Diplazium sammatii* (Kuhn) C.Chr.; Athyraceae | DRC: Andole, aneke | Young leaves are cooked as leafy vegetable [21] |
| Nigeria: Nyama idim | Young still enrolled fronds (croziers, fiddleheads) are eaten as a cooked vegetable [27] |
| *Dryopteris wallichiana* (Spreng) Hyl.; Dryopteridaceae | Nigeria: Mountain wood fern, mbabe, ire, aja nmuo | Leaves are used as fodder for goats and sheep [15] |
| *Lomariopsis* sp.; Lomariopsidaceae | DRC: Asaha | Young leaves cooked as condiment [21] |
| *Marsilea minuta* L.; Marsileaceae | Gambia | Tender leaves eaten as a potherb [28] |
| *Marsilea minuta* L.; Marsileaceae | Senegal | Tender leaves eaten as a potherb [28] |
| *Nephrolepis biserrata* (Sw.) Schott; Davalliaceae | DRC: Asaha, likekele | Young leaves are cooked as condiment or leafy vegetable [21] |
| Nigeria | Leaves used as fodder for goats and other ruminants [29] |
| *Nephrolepis cordifolia* (L.) Presl.; Davalliaceae | Nigeria: Erect swordfern, nma ozo | Rhizomes are cleaned and boiled with salt and water and eaten as food [15] |
| *Ophioglossum grande* L.; Ophioglossaceae | Nigeria: Ribbon fern, achu, tsage | Young fronds used as fodder for goats [15] |
| *Ophioglossum lusoafricanum* Prantl; Ophioglossaceae | Swaziland: Adder's tongue, sankunshane, sankuntjane, shucelane | Edible leaves [24] |
| *Ophioglossum ovatum* Bory; Ophioglossaceae | Madagascar, Antandroy tribe | Leaves eaten as vegetable [30] |
| *Ophioglossum polyphyllum* A. Braun; Ophioglossaceae | Namibia | Used as famine food when few other plants are available but the species is not popular or well known [31] |
| South Africa: isiNkuntshane, isiNdletshane | Leaves eaten as leafy vegetable [6,32] |
| *Ophioglossum reticulatum* L.; Ophioglossaceae | South Africa: Adder-tongue fern | Leaves eaten as vegetable [33] |
| Swaziland: Adder's tongue | Leaves eaten as leafy vegetable [24] |
| Zanzibar, Tanzania | Leaves eaten as salad or cooked as vegetable [34] |
| *Ophioglossum vulgatum* L.; Ophioglossaceae | Nigeria | Leaves eaten as leafy vegetable [15] |
| *Pteridium aquilinum* (L.) Kuhn; Dennsteadtiaceae | Angola | Several tribes eat the leaves [30] |
| Cameroon | Consumed on a regular basis together with *Vernonia amygdalina* Delile and *Triumfetta rhomboidea* Jacq. [30] |
| DRC: lilele, isili | Immature fronds cooked as condiment or vegetable [21,35] |
| Gabon | Young still enrolled fronds (croziers, fiddleheads) are eaten [30] |
| Madagascar | Rhizome is eaten [30] |
| Nigeria: Eastern bracken, turkey foot fern, ogoni, ukwunnume | Decoction of rhizome drunk as herbal health tea, young fronds eaten as vegetables [15]. Young still enrolled fronds (croziers, fiddleheads) are eaten as vegetable by the tribal people [36] |
| South Africa: Adelaarsvaring, brackern fern, eagle fern, umbewe, umhlashoshana | South Africa: Young fronds and rhizomes are cooked and eaten by the Zulu and Tswana [37] |
| *Stenochlaena tenuifolia* (Desv.) T.Moore; Blechnaceae | Madagascar | The young fronds (croziers, fiddleheads) are eaten as vegetable [38] |
